# Supplementary material for: A carbon nanocoil-based flexible tip for a live cell study of mechanotransduction and electro-physiological characteristics
Source: Royal Society of Chemistry journal article supplement (doi:10.1039/c9tb02564b), 2020-01-01
Supplement: c9tb02564b2.pdf [file c9tb02564b2.pdf]

# Supporting Information

## Carbon Nanocoil Based Flexible Tip for Live Cell Study of Mechanotransduction and Electro-physiological Characteristics

Peng Wang<sup>1,3+</sup>, Chunyang Geng<sup>2+</sup>, Lujun Pan<sup>1\*</sup>, Bo Liu<sup>2\*</sup>

1 School of Physics, Dalian University of Technology, No.2 Linggong Road, Ganjingzi District, Dalian, Liaoning, 116024, P.R. China

2 Department of Biomedical Engineering, Dalian University of Technology, No.2 Linggong Road, Ganjingzi District, Dalian, Liaoning, 116024, P.R. China

3 Physics Department, Xinzhou Teachers University, No.10 Heping West Street, Xinzhou, Shanxi, 034000, P.R. China

\* Corresponding Author Email: lpan@dlut.edu.cn (L. Pan); lbo@dlut.edu.cn (B. Liu)

<sup>+</sup>These authors contributed equally to this work.

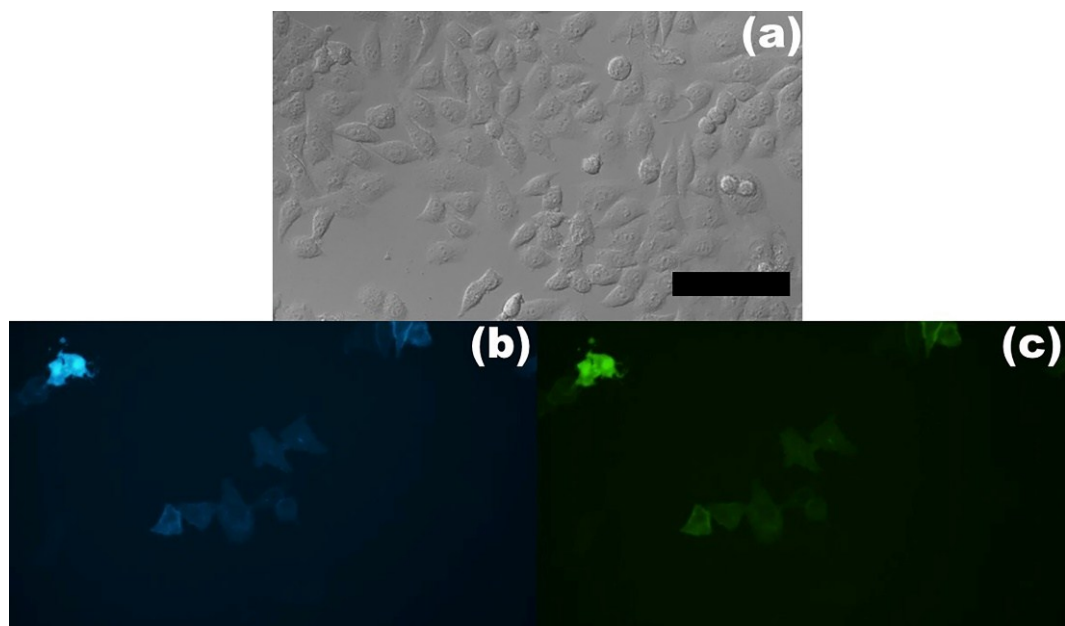

Figure S1. (a) The optical images of osteosarcoma cells. The fluorescence images of (b) ECFP and (c) EYFP. The scale bar is 100  $\mu\text{m}$ . The wavelengths of the excited laser, donor emission light and acceptor emission light are 440 nm, 480 nm and 535 nm, respectively.

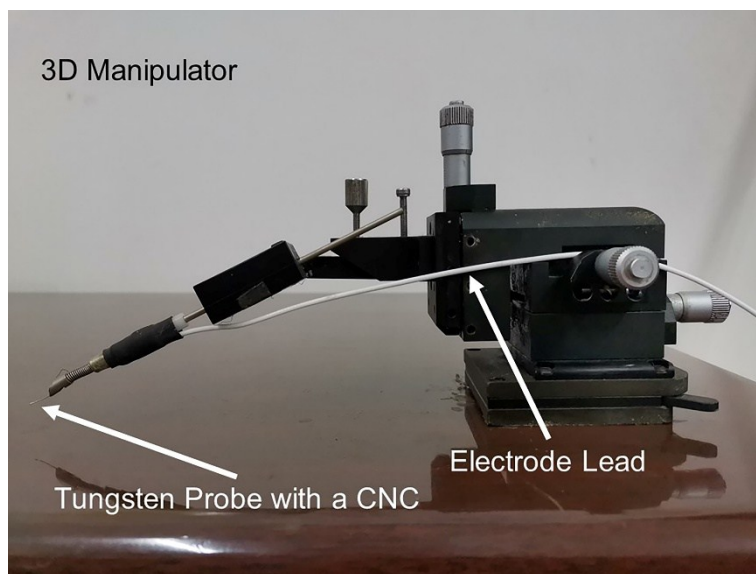

Figure S2. 3D micro manipulator with CNC-tungsten tip.

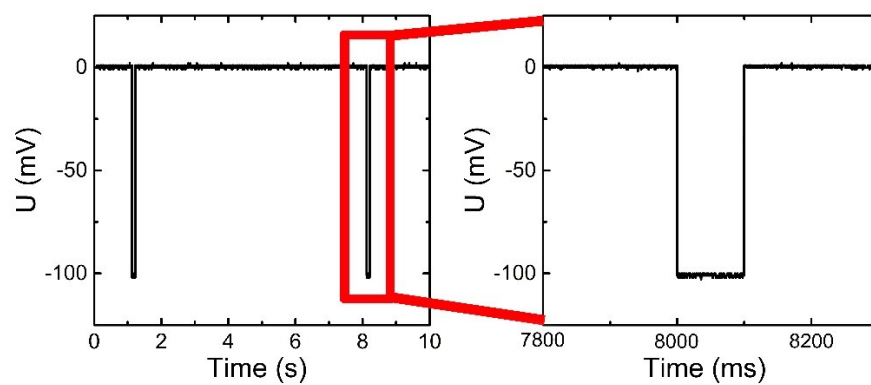

Figure S3. The electrical signal on carbon nanocoil.

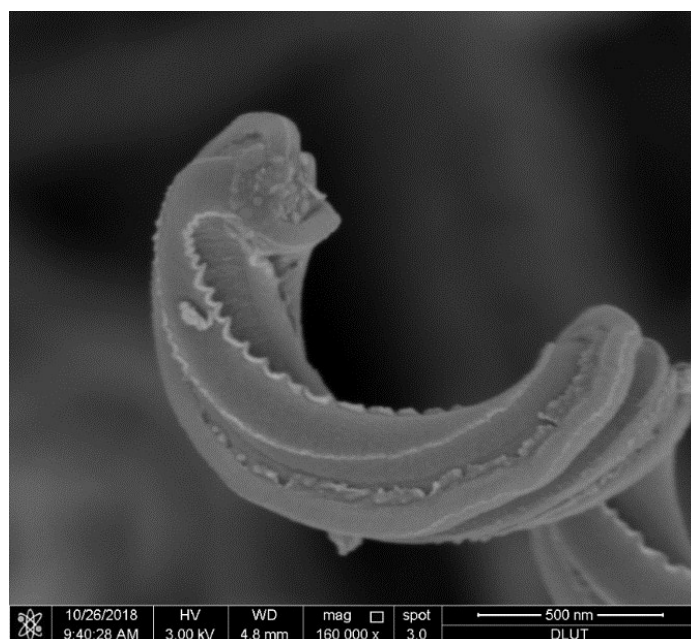

Fig. S4 The SEM image of a single CNC.

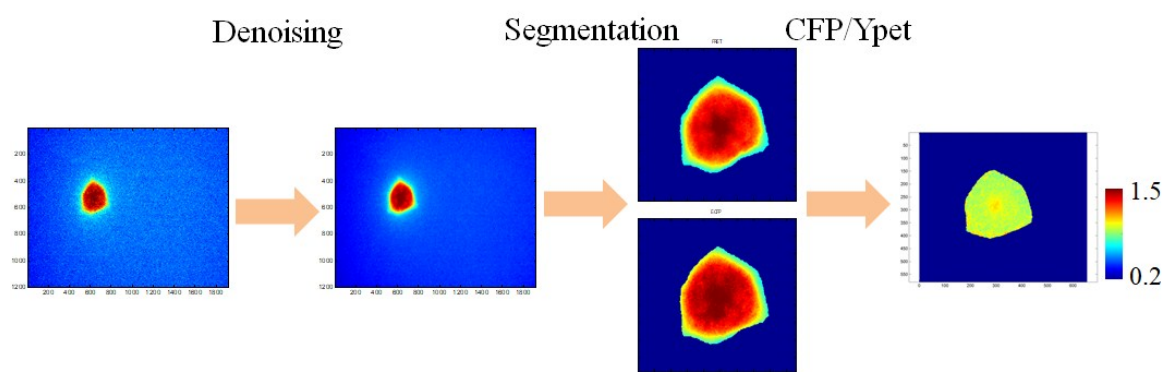

Figure S5. The fluorescence imaging procedure.
